# Supplementary material for: One pot ‘click’ reaction: CuII–hydrotalcite catalyzed tandem synthesis of β-hydroxy triazoles via regioselective opening of epoxide followed by [3+2] cycloaddition
Source: Royal Society of Chemistry journal article supplement (doi:10.1039/c2cy20052j), 2012-01-01
Supplement: c2cy20052j.pdf [file c2cy20052j.pdf]

## Supporting Information

**One pot ‘click’ reaction: Cu<sup>II</sup>–hydrotalcite catalyzed tandem synthesis of  $\beta$ -hydroxy triazoles via regioselective opening of epoxide followed by [3+2] cycloaddition**

**Avvari N. Prasad, Boningari Thirupathi, Gangadhara Raju, Rapelli Srinivas and Benjaram M. Reddy\***

*Inorganic and Physical Chemistry Division, CSIR–Indian Institute of Chemical Technology, Uppal Road, Hyderabad – 500 607, India*

**1. General Information:**  $^1\text{H}$  NMR spectra were recorded on Varian VXR-Unity 200 MHz, Bruker UXNMR/XWIN-NMR Avance-300 MHz, and GEMINI spectrometers. Chemical shifts ( $\delta$ ) are given in ppm relative to tetramethylsilane (TMS), which is used as an internal standard, and the coupling constants ( $J$ ) are reported in Hz. Splitting patterns of proton are described as s, d, dd, t, q, br s, and m, which stand for the resonance multiplicities singlet, doublet, doublet of doublet, triplet, quartet, broad singlet, and multiplet, respectively. Only the most important IR absorptions ( $\text{cm}^{-1}$ ) and the molecular ions and/or base peaks in MS are given.

**2.  $^1\text{H}$  NMR, FTIR, MS data of Isolated Products:**

**Table 2, Entry 1: 2-(4-Phenyl-1*H*-1,2,3-triazol-1-yl)cyclohexanol:**

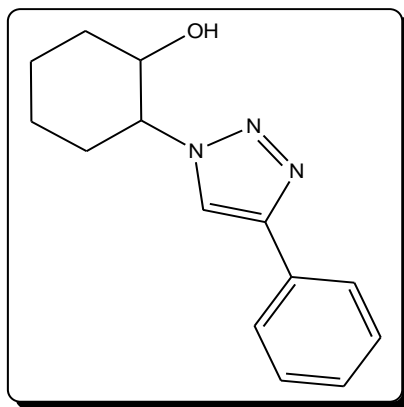

$^1\text{H}$  NMR ( $\text{CDCl}_3$ )  $\delta$  1.23–1.29 (m, 2H), 1.46–1.51 (m, 2H), 1.87–1.94 (m, 2H), 2.17–2.27 (m, 2H), 3.56 (br s, 1H), 4.04–4.08 (m, 1H), 4.09–4.14 (m, 1H), 7.26–7.36 (m, 3H), 7.62–7.65 (m, 2H), 7.68 (s, 1H). IR (KBr)  $\nu/\text{cm}^{-1}$  3306, 3117, 2933, 2857, 1448, 1231, 1083, 964, 765, 695, 556. MS (ESI)  $m/z$ : 244 [ $\text{M}^+ + 1$ ].

**Table 2, Entry 2: 2-(4-Hexyl-1*H*-1,2,3-triazol-1-yl)cyclohexanol:**

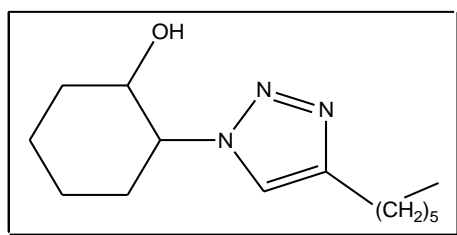

$^1\text{H NMR}$  ( $\text{CDCl}_3$ )  $\delta$  0.90 (t,  $J = 7.72$  Hz, 3H), 0.93 (t,  $J = 7.72$  Hz, 2H) 1.30–1.38 (m, 12H), 1.45–1.52 (m, 2H), 1.64–1.74 (m, 2H), 2.49–2.55 (m, 1H), 2.63–2.68 (m, 1H), 7.26 (s, 1H). IR (KBr  $\text{v}/\text{cm}^{-1}$  3296, 3142, 2931, 2855, 1551, 1457, 1359, 1209, 1083, 957, 806, 639. MS (ESI)  $m/z$ : 251 [ $\text{M}^+ + 1$ ].

**Table 2, Entry 3: 2-(4-*m*-Tolyl-1*H*-1,2,3-triazol-1-yl)cyclohexanol:**

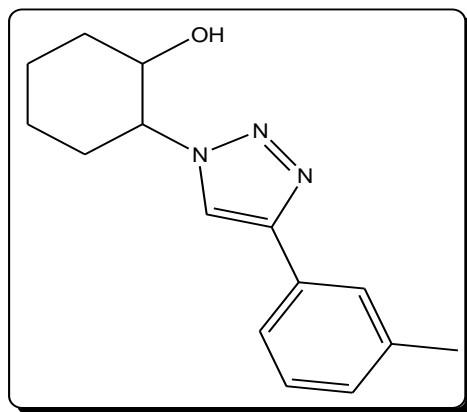

$^1\text{H NMR}$  ( $\text{CDCl}_3$ )  $\delta$  1.42–1.48 (m, 4H), 1.85–1.95 (m, 2H), 2.16–2.25 (m, 2H), 2.35 (s, 3H), 3.87 (br s, 1H), 3.97–4.00 (m, 1H), 4.01–4.04 (m, 1H), 7.02–7.08 (m, 1H), 7.18–7.23 (m, 1H), 7.38–7.45 (m, 2H), 7.65 (s, 1H). IR (KBr  $\text{v}/\text{cm}^{-1}$  3301, 3117, 2928, 2856, 1609, 1450, 1232, 1083, 844, 789, 696. MS (ESI)  $m/z$ : 257 [ $\text{M}^+ + 1$ ].

**Table 2, Entry 4: 1-Chloro-3-(4-phenyl-1*H*-1,2,3-triazol-1-yl)propan-2-ol:**

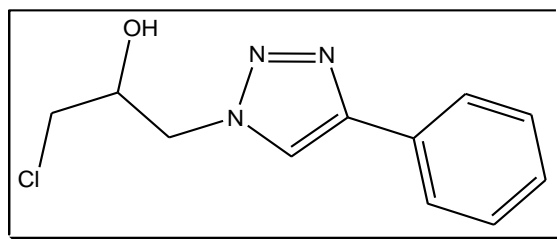

$^1\text{H NMR}$  ( $\text{CDCl}_3$ )  $\delta$  2.50–2.55 (m, 1H), 2.87–2.92 (m, 1H), 3.34–3.39 (m, 1H) 4.35 (dd,  $J = 6.04, 8.49$  Hz, 1H), 4.84 (dd,  $J = 2.64, 12.08$  Hz, 1H), 7.27–7.31(m, 1H), 7.36–7.41 (m, 2H), 7.78–7.82 (m, 2H), 7.84 (s, 1H). IR (KBr)  $\nu/\text{cm}^{-1}$  3322, 2923, 2853, 1734, 1459, 1260, 1089, 1025, 800, 696. MS (ESI)  $m/z$ : 238 [ $\text{M}^++1$ ].

**Table 2, Entry 5: 1-Chloro-3-(4-(4-fluoro-3-methyl-phenyl)-1*H*-1,2,3-triazol-1-yl)propan-2-ol:**

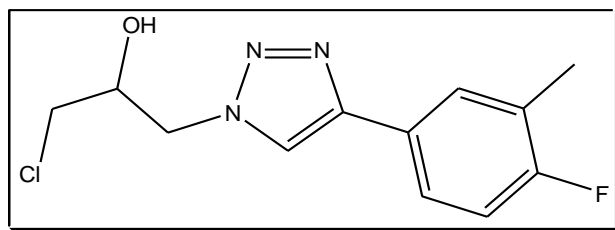

$^1\text{H NMR}$  ( $\text{CDCl}_3$ )  $\delta$  2.34 (s, 3H), 2.89–2.93 (m, 1H), 3.34–3.39 (m, 1H), 4.29–4.36 (m, 1H), 4.82–4.88 (m, 1H), 6.99–7.05 (m, 1H), 7.54–7.59 (m, 1H), 7.66–7.71 (m, 1H), 7.79 (s, 1H). IR (KBr)  $\nu/\text{cm}^{-1}$  3346, 2925, 2854, 1737, 1461, 1236, 1176, 1078, 759, 592. MS (ESI)  $m/z$ : 270 [ $\text{M}^++1$ ].

**Table 2, Entry 6: 2-Phenyl-2-(4-phenyl-1H-1,2,3-triazol-1-yl)ethanol:**

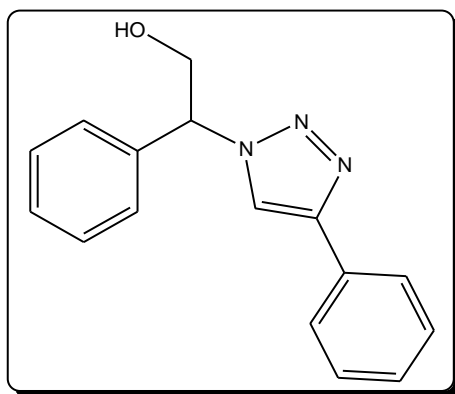

$^1\text{H}$  NMR ( $\text{CDCl}_3$ )  $\delta$  3.42 (br s, 1H), 4.17 (dd,  $J = 3.39, 12.46$  Hz, 1H), 4.62 (dd,  $J = 8.30, 12.46$  Hz, 1H), 5.62 (dd,  $J = 3.39, 8.30$  Hz, 1H), 7.22–7.29 (m, 3H), 7.32–7.37 (m, 5H), 7.62 (s, 1H), 7.71 (d,  $J = 6.98$  Hz, 2H). IR (KBr)  $\nu/\text{cm}^{-1}$  3400, 3091, 2962, 2855, 1611, 1458, 1221, 1076, 1049, 760, 694. MS (ESI)  $m/z$ : 266 [ $\text{M}^+ + 1$ ].

**Table 2, Entry 7: 1-(4-Propyl-1H-1,2,3-triazol-1-yl)-butan-2-ol:**

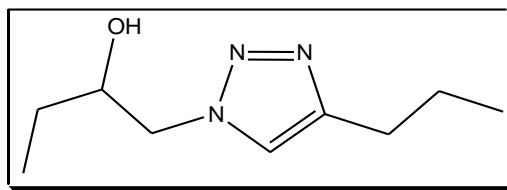

$^1\text{H}$  NMR ( $\text{CDCl}_3$ )  $\delta$  0.96 (t,  $J = 7.55$  Hz, 3H), 1.04 (t,  $J = 7.55$  Hz, 3H), 1.47–1.58 (m, 2H), 1.62–1.69 (m, 2H), 2.60 (t,  $J = 7.55$  Hz, 2H), 3.93–4.01 (m, 1H), 4.14 (dd,  $J = 8.30, 13.59$  Hz, 1H), 4.37 (dd,  $J = 3.02, 13.59$  Hz, 1H), 7.33 (s, 1H). IR (KBr)  $\nu/\text{cm}^{-1}$  3235, 2962, 2874, 1564, 1461, 1221, 1056, 798. MS (EI)  $m/z$ : 184 [ $\text{M}^+ + 1$ ].

**Table 2, Entry 8: 2-(4-(4-Fluoro-3-methylphenyl)-1H-1,2,3-triazol-1-yl)-2-phenylethanol:**

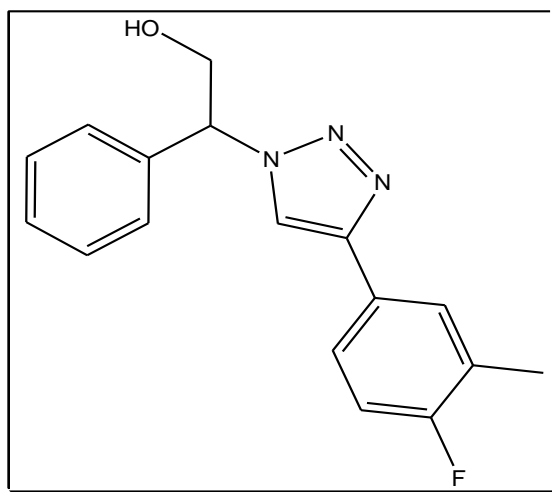

$^1\text{H NMR}$  ( $\text{CDCl}_3$ )  $\delta$  2.31 (s, 3H), 4.12–4.20 (m, 1H), 4.56–4.65 (m, 1H), 5.60 (dd,  $J = 3.77, 8.30$  Hz, 1H), 6.95–7.02 (m, 1H), 7.18–7.24 (m, 2H), 7.33–7.38 (m, 3H), 7.49–7.54 (m, 1H), 7.56 (s, 1H), 7.58–7.61 (m, 1H). IR (KBr)  $\nu/\text{cm}^{-1}$  3404, 3138, 2927, 1612, 1490, 1196, 1060, 809, 705, 626. MS (ESI)  $m/z$ : 298 [ $\text{M}^+ + 1$ ].

**Table 2, Entry 9: 2-Phenyl-2-(4-*m*-tolyl-1H-1,2,3-triazol-1-yl)ethanol:**

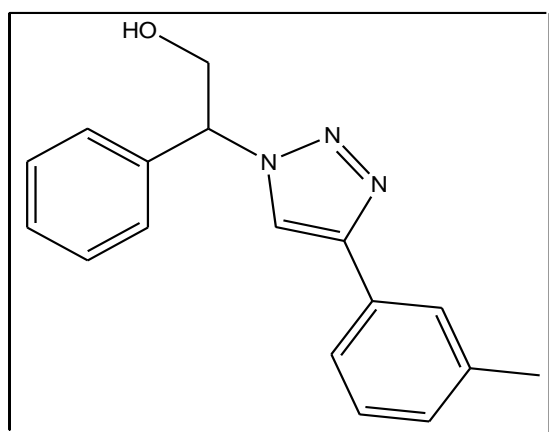

$^1\text{H NMR}$  ( $\text{CDCl}_3$ )  $\delta$  2.37 (s, 3H), 3.47 (br s, 1H), 4.12–4.20 (m, 1H), 4.57–4.65 (m, 1H), 5.61 (dd,  $J = 4.53, 8.30$  Hz, 1H), 7.06–7.10 (m, 1H), 7.22–7.26 (m, 3H), 7.33–7.37 (m,

2H), 7.49–7.54 (m, 2H), 7.59 (s, 1H). IR (KBr)  $\nu/\text{cm}^{-1}$  3421, 3131, 2926, 1590, 1454, 1215, 1153, 1049, 782, 704, 547. MS (ESI)  $m/z$ : 280 [ $M^+ + 1$ ].

**Table 2, Entry 10: 2-(4-Hexyl-1*H*-1,2,3-triazol-1-yl)-2-phenylethanol:**

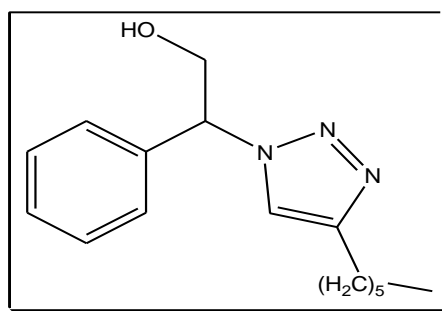

$^1\text{H}$  NMR ( $\text{CDCl}_3$ )  $\delta$  0.87 (t,  $J = 6.79$  Hz, 3H), 1.25–1.32 (m, 6H), 1.57–1.64 (m, 2H), 2.46 (t,  $J = 7.55$  Hz, 2H), 3.59 (br s, 1H), 4.10 (dd,  $J = 3.02, 12.27$  Hz, 1H), 4.54 (dd,  $J = 8.49, 12.27$  Hz, 1H), 5.52 (dd,  $J = 3.77, 12.27$  Hz, 1H), 7.14–7.19 (m, 3H), 7.30–7.35 (m, 3H). IR (KBr)  $\nu/\text{cm}^{-1}$  3381, 3069, 2923, 2850, 1557, 1459, 1217, 1145, 1055, 848, 754, 539. MS (ESI)  $m/z$ : 274 [ $M^+ + 1$ ].

**Table 2, Entry 11: 1-(4-Phenyl-1*H*-1,2,3-triazol-1-yl)propan-2-ol:**

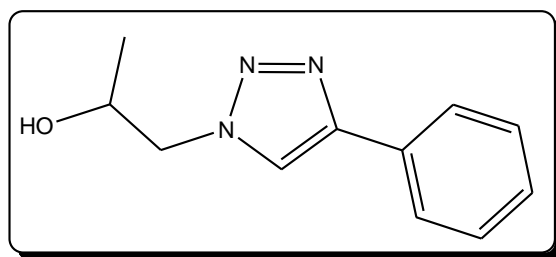

$^1\text{H}$  NMR ( $\text{CDCl}_3$ )  $\delta$  1.32 (d,  $J = 6.23$  Hz, 3H), 4.19 (dd,  $J = 5.66, 7.74$  Hz, 1H), 4.30–4.37 (m, 1H), 4.42  $\nu/\text{cm}^{-1}$  4.47 (m, 1H), 7.26–7.37 (m, 3H), 7.66–7.71 (m, 2H), 7.75 (s,

1H). IR (KBr): 3260, 2923, 2854, 1610, 1431, 1261, 1088, 813, 695. MS (ESI)  $m/z$ : 204 [M<sup>+</sup>+1].

**Table 2, Entry 12; 1-(4-Propyl-1*H*-1,2,3-triazol-1-yl)propan-2-ol:**

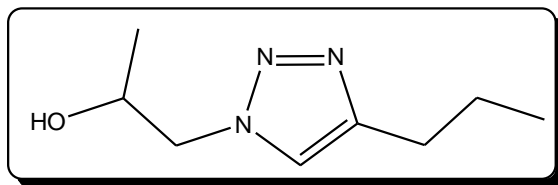

<sup>1</sup>H NMR (CDCl<sub>3</sub>) δ 0.95 (t,  $J = 7.55$  Hz, 3H), 1.22 (d,  $J = 6.04$  Hz, 3H), 1.65 (m, 2H), 2.59 (t,  $J = 7.55$  Hz, 2H), 4.14 (dd,  $J = 5.28, 7.55$  Hz, 1H), 4.19–4.24 (m, 1H), 4.32 (dd,  $J = 2.26, 10.57$  Hz, 1H), 7.37 (s, 1H). IR (KBr)  $\nu/\text{cm}^{-1}$  3260, 3141, 2923, 2854, 1610, 1431, 1261, 1088, 813, 764, 695. MS (EI)  $m/z$ : 170 [M<sup>+</sup>+1].

**Table 2, Entry 13; 2-(4-Chlorophenyl)-2-(4-(4-fluoro 3-methylphenyl)-1*H*-1,2,3-triazol-1-yl)ethanol:**

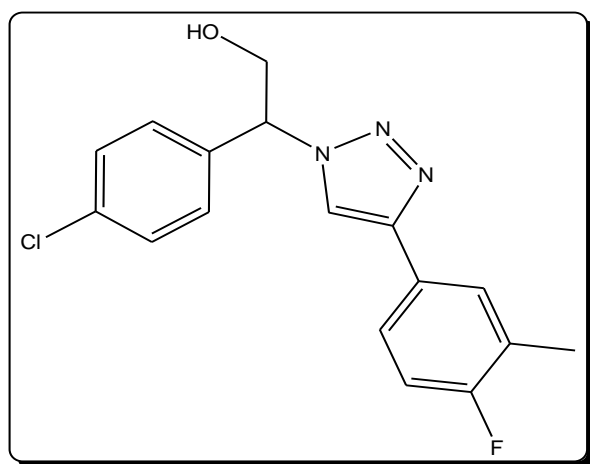



$^1\text{H}$  NMR ( $\text{CDCl}_3$ )  $\delta$  2.35 (s, 3H), 3.90 (br s, 1H), 4.17 (dd,  $J = 3.02, 9.06$  Hz, 1H), 4.58 (dd,  $J = 3.96, 8.12$  Hz, 1H), 5.58 (dd,  $J = 3.02, 4.15$  Hz, 1H), 7.19–7.25 (m, 3H), 7.27–7.34 (m, 2H), 7.43–7.48 (m, 2H), 7.59 (s, 1H). IR (KBr)  $\nu/\text{cm}^{-1}$  3326, 2925, 1710, 1493, 1237, 1091, 800, 508. MS (ESI)  $m/z$ : 332 [ $\text{M}^+ + 1$ ].

**Table 2, Entry 14: 2-(4-Chlorophenyl)-2-(4-*m*-tolyl-1*H*-1,2,3-triazol-1-yl)ethanol:**

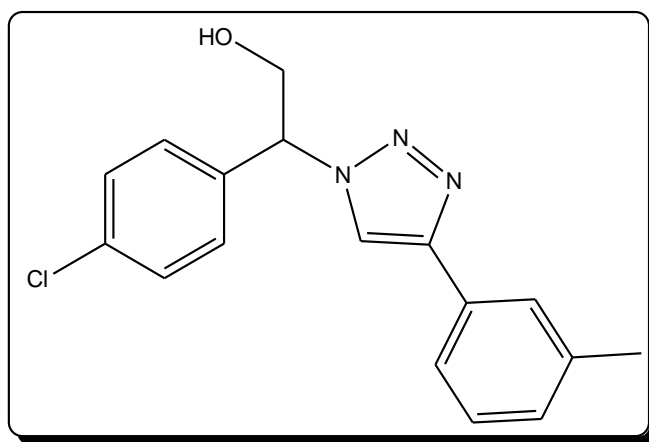

$^1\text{H}$  NMR ( $\text{CDCl}_3$ )  $\delta$  2.35 (s, 3H), 3.90 (br s, 1H) 4.16 (dd,  $J = 3.96, 9.06$  Hz, 1H), 4.55 (dd,  $J = 3.96, 8.12$  Hz, 1H), 5.58 (dd,  $J = 3.02, 4.15$  Hz, 1H), 7.05–7.10 (m, 1H), 7.19–7.25 (m, 3H), 7.27–7.34 (m, 2H), 7.43–7.49 (m, 2H), 7.59 (s, 1H). IR (KBr)  $\nu/\text{cm}^{-1}$  3374, 2925, 1597, 1489, 1410, 1224, 1086, 784, 694, 530. MS (ESI)  $m/z$ : 314 [ $\text{M}^+ + 1$ ].

**Table 2, Entry 15: 2-(4-Chlorophenyl)-2-(4-hexyl-1*H*-1,2,3-triazol-1-yl)ethanol:**

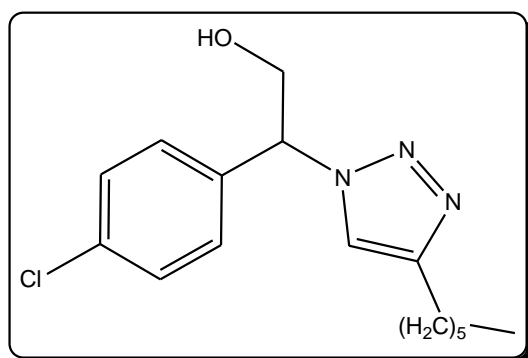

$^1\text{H}$  NMR ( $\text{CDCl}_3$ )  $\delta$  0.87 (t,  $J = 6.79$  Hz, 3H), 1.22–1.34 (m, 8H), 2.63 (t,  $J = 7.55$  Hz, 2H), 4.10 (dd,  $J = 3.77, 5.22$  Hz, 1H), 4.49 (dd,  $J = 3.96, 8.12$  Hz, 1H), 5.51 (dd,  $J = 3.77, 4.34$  Hz, 1H), 7.14–7.28 (m, 4H), 7.30 (s, 1H). IR (KBr)  $\nu/\text{cm}^{-1}$  3314, 2927, 1578, 1493, 1222, 1076, 1015, 765, 586. MS (ESI)  $m/z$ : 308 [ $\text{M}^+ + 1$ ].

**Table 2, Entry 16: 2-(4-Chlorophenyl)-2-(4-phenyl-1*H*-1,2,3-triazole-1-yl)ethanol:**

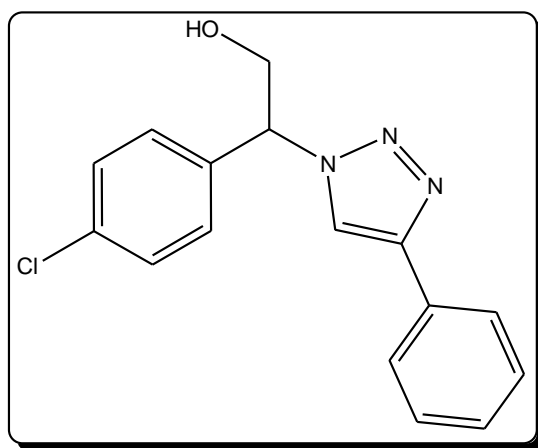

$^1\text{H}$  NMR ( $\text{CDCl}_3$ )  $\delta$  4.14–4.22 (m, 1H), 4.53–4.61 (m, 1H), 5.55–5.61 (m, 1H), 7.20–7.25 (m, 3H), 7.33–7.38 (m, 4H), 7.61 (s, 1H), 7.69–7.74 (m, 2H). IR (KBr)  $\nu/\text{cm}^{-1}$  3347, 3084, 2925, 2854, 1597, 1489, 1459, 1223, 1088, 1048, 1019, 818, 763, 690, 512. MS (ESI)  $m/z$ : 300 [ $\text{M}^+ + 1$ ].
